# Supplementary material for: Anharmonic force field, structure, and thermochemistry of CF2 and CCl2Electronic supplementary information (ESI) available: Force constants and thermochemical properties of CF2 and CCl2. See http://www.rsc.org/suppdata/cp/b2/b202865d/
Source: Royal Society of Chemistry journal article supplement (doi:10.1039/b202865d), 2002-06-10
Supplement: tables.pdf [file tables.pdf]

Electronic Supplementary Information for Paper B202865D :

Anharmonic force field, structure, and thermochemistry of CF<sub>2</sub> and CCl<sub>2</sub>.

by J. Demaison,<sup>\*a</sup> L. Margulès,<sup>a</sup> J. M. L. Martin,<sup>\*b</sup> and James E. Boggs<sup>c</sup>

Table S1. Quadratic, cubic, and quartic force constants of CF<sub>2</sub> in dimensionless normal coordinates (all values in cm<sup>-1</sup>)

| Constant   | Value   | Constant | Value  |
|------------|---------|----------|--------|
| $\omega_1$ | 1251.68 | 1111     | 32.69  |
| $\omega_2$ | 677.99  | 1112     | 32.61  |
| $\omega_3$ | 1146.32 | 1122     | -0.13  |
| 111        | -258.35 | 1133     | 109.71 |
| 112        | -75.41  | 1222     | 5.41   |
| 122        | -30.01  | 1233     | 27.72  |
| 133        | -391.25 | 2222     | 21.77  |
| 222        | -111.16 | 2233     | -18.48 |
| 233        | -61.46  | 3333     | 114.82 |

<sup>a</sup> CCSD(T)(ae)/cc-pwCVQZ for the quadratic and cubic constants  
CCSD(T)(ae)/cc-pCVTZ for the quartic constants

Table S2. Quadratic, cubic, and quartic force constants of CCl<sub>2</sub> in dimensionless normal coordinates (all values in cm<sup>-1</sup>)

| Constant   | MP2 <sup>a</sup> | CCSD(T) <sup>b</sup> | Constant | MP2 <sup>a</sup> | CCSD(T) <sup>b</sup> |
|------------|------------------|----------------------|----------|------------------|----------------------|
| $\omega_1$ | 760.96           | 735.33               | 1111     | -1.73            | -2.77                |
| $\omega_2$ | 350.44           | 335.93               | 1112     | 19.03            | 18.25                |
| $\omega_3$ | 799.76           | 769.62               | 1122     | 1.17             | 1.87                 |
| 111        | -92.88           | -91.75               | 1133     | 61.07            | 60.03                |
| 112        | -51.94           | -49.28               | 1222     | -0.80            | -0.49                |
| 122        | -9.02            | -9.76                | 1233     | 12.85            | 11.62                |
| 133        | -248.51          | -234.57              | 2222     | 6.79             | 6.92                 |
| 222        | -40.73           | -41.82               | 2233     | -10.10           | -10.26               |
| 233        | -33.61           | -36.69               | 3333     | 61.52            | 9.15                 |

<sup>a</sup> MP2(fc)/cc-pVQZ+1

<sup>b</sup> Harmonic wavenumbers from CCSD(T)(ae)/cc-pCVTZ+aug(Cl) and anharmonic constants from CCSD(T)(ae)/cc-pCVTZ

Table S3. Thermochemical properties of CF<sub>2</sub>.

| $T$<br>K | $H(T) - H(0)$<br>kJ mol <sup>-1</sup> | $C_p$<br>J mol <sup>-1</sup> K <sup>-1</sup> | $S$<br>J mol <sup>-1</sup> K <sup>-1</sup> |
|----------|---------------------------------------|----------------------------------------------|--------------------------------------------|
| 180      | 6.03                                  | 34.55                                        | 222.47                                     |
| 200      | 6.73                                  | 35.14                                        | 226.14                                     |
| 220      | 7.43                                  | 35.81                                        | 229.52                                     |
| 250      | 8.53                                  | 36.93                                        | 234.17                                     |
| 298.15   | 10.35                                 | 38.92                                        | 240.84                                     |
| 400      | 14.53                                 | 43.11                                        | 252.87                                     |
| 500      | 19.02                                 | 46.58                                        | 262.88                                     |
| 600      | 23.82                                 | 49.25                                        | 271.62                                     |
| 800      | 34.06                                 | 52.81                                        | 286.32                                     |
| 1000     | 44.85                                 | 54.92                                        | 298.35                                     |
| 1200     | 55.98                                 | 56.29                                        | 308.49                                     |
| 1500     | 73.08                                 | 57.63                                        | 321.21                                     |
| 2000     | 102.27                                | 59.04                                        | 337.99                                     |
| 2500     | 132.06                                | 60.09                                        | 351.28                                     |
| 3000     | 162.34                                | 61.05                                        | 362.32                                     |

Table S4. Thermochemical properties of CCl<sub>2</sub>.

| $T$<br>K | $H(T) - H(0)$<br>kJ mol <sup>-1</sup> | $C_p$<br>J mol <sup>-1</sup> K <sup>-1</sup> | $S$<br>J mol <sup>-1</sup> K <sup>-1</sup> |
|----------|---------------------------------------|----------------------------------------------|--------------------------------------------|
| 180      | 6.34                                  | 39.68                                        | 243.57                                     |
| 200      | 7.14                                  | 40.96                                        | 247.82                                     |
| 220      | 7.98                                  | 42.21                                        | 251.78                                     |
| 250      | 9.27                                  | 44.01                                        | 257.29                                     |
| 298.15   | 11.45                                 | 46.58                                        | 265.27                                     |
| 400      | 16.42                                 | 50.62                                        | 279.56                                     |
| 500      | 21.62                                 | 53.17                                        | 291.15                                     |
| 600      | 27.02                                 | 54.87                                        | 301.01                                     |
| 800      | 38.23                                 | 56.94                                        | 317.11                                     |
| 1000     | 49.75                                 | 58.18                                        | 329.96                                     |
| 1200     | 61.47                                 | 59.05                                        | 340.64                                     |
| 1500     | 79.35                                 | 60.06                                        | 353.93                                     |
| 2000     | 109.74                                | 61.46                                        | 371.41                                     |
| 2500     | 140.86                                | 62.89                                        | 385.29                                     |
| 3000     | 172.65                                | 64.32                                        | 396.89                                     |
